# Supplementary figures and images for: Dietary restriction increases protective gut bacteria to rescue lethal methotrexate-induced intestinal toxicity
Source: PubMed Central journal article supplement — Gut Microbes. 2020 Jan 26;12(1):1714401. doi: 10.1080/19490976.2020.1714401 (PMC7524152; doi:10.1080/19490976.2020.1714401), 2020-01-26

A

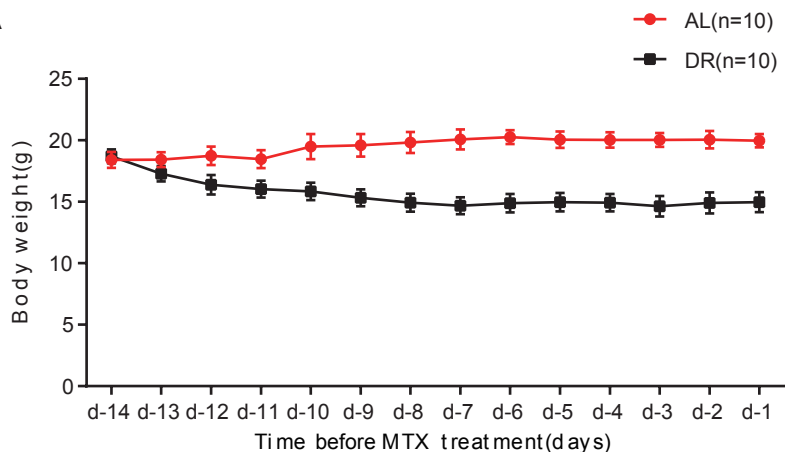

B

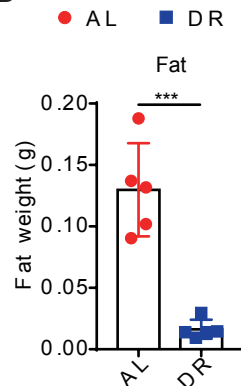

C

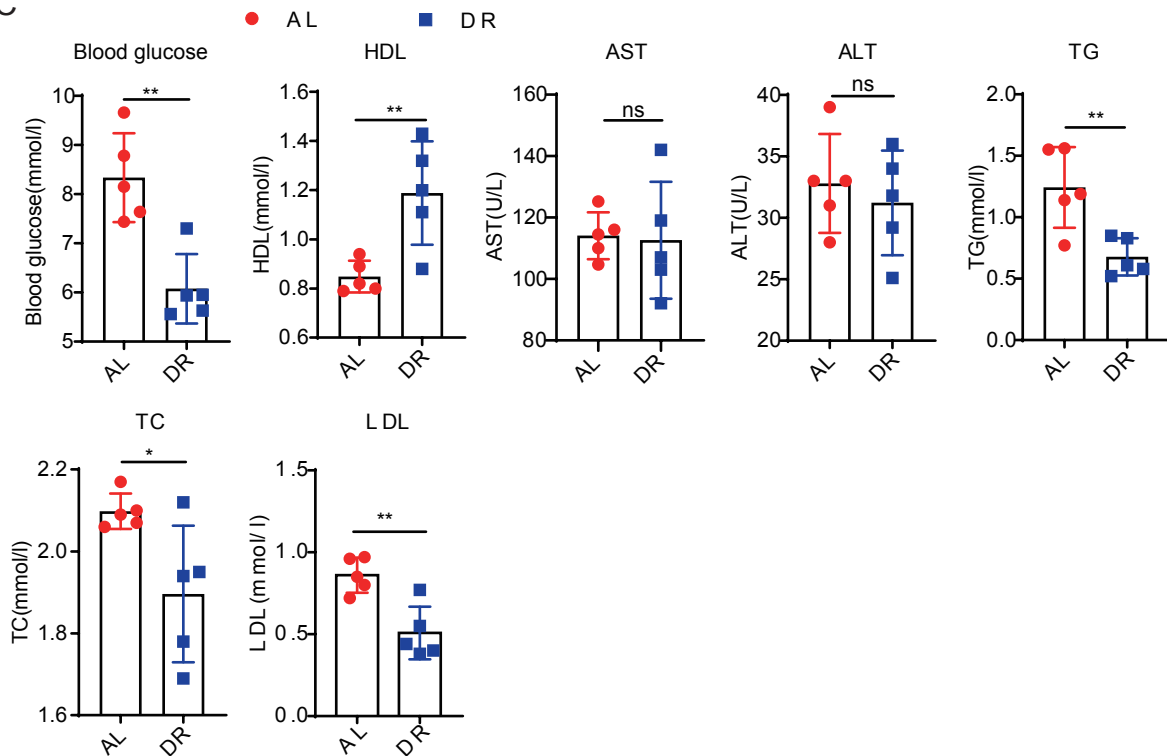

Supplement: KGMI_A_1714401_SM6249.pdf [file KGMI_A_1714401_SM6249.pdf]
